# Supplementary material
Source: publisher figshare collection journal article supplement (https://acs.figshare.com/ndownloader/files/3781543)

- 1
- 2
- 3
- 4
- 5
- 6
- 7
- 8
- 9
- 0
- 1
- 2
- 3
- 4
- 5
- 6
- 7
- 8

Chao Huang<sup>a</sup>, Ming Miao<sup>a,\*</sup>, Srinivas Janaswamy<sup>a,b</sup>, Bruce R. Hamaker<sup>a,b</sup>, Xingfeng  
Li<sup>c</sup>, Bo Jiang<sup>a,\*</sup>

*Whistler Center for Carbohydrate Research, Department of Food Science, Purdue University, 745 Agriculture Mall Drive, West Lafayette, IN 47907-2009, USA*

Corresponding author. Address: State Key Laboratory of Food Science & Technology, 1800 Lihu Avenue, Wuxi, Jiangsu 214122, P. R. China. Tel: +86 (0)510 853 27859; Fax: +86 (0)510 859 19161.

*E-mail address:* miaoming@jiangnan.edu.cn (M. Miao)

**Figure S1** Comparison of aqueous solutions of native and enzyme treated glucans

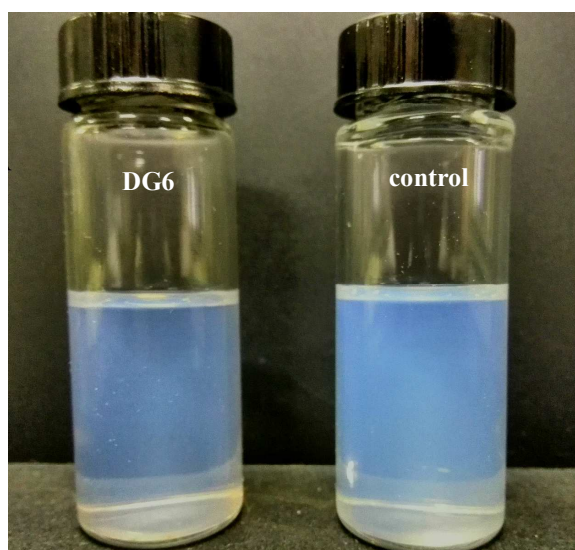

Supplement: Supplementary file 1 [file 3781543]
